# Supplementary material
Source: MDPI journal article supplement (https://www.mdpi.com/2073-4352/12/10/1352)
Supplement: s1 [file s1 › crystals-1907543-supplementary.pdf]

## Supplementary Materials

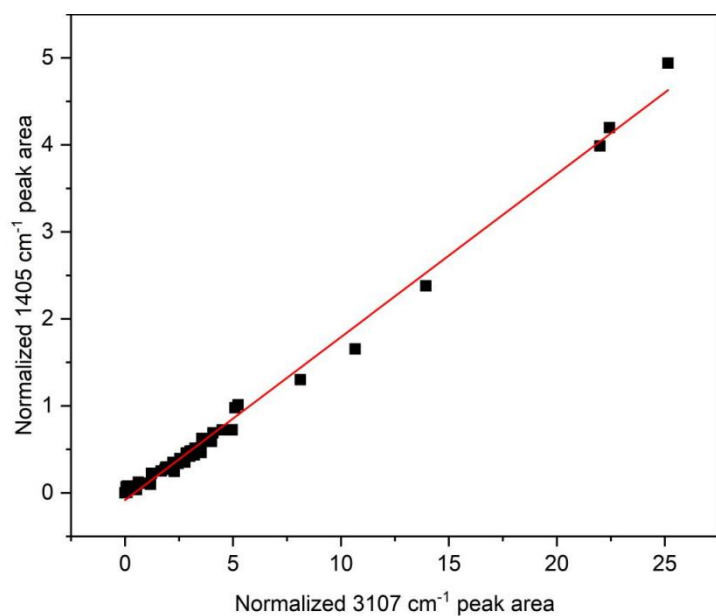

**Figure S1.** The linear relationship of peak area between 3107 and 1405 cm<sup>-1</sup>, the slope value is 0.19.

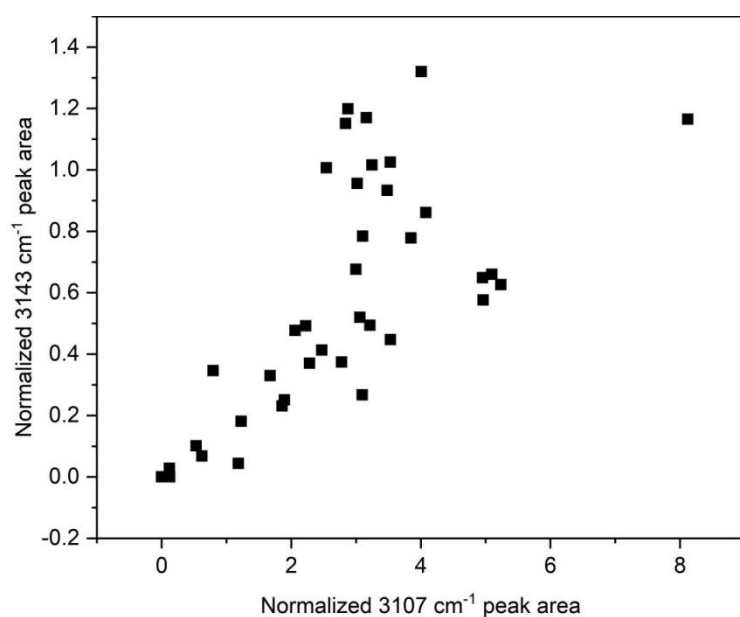

**Figure S2.** There was no strict linear relationship about the peak area between the 3107 and 3143 cm<sup>-1</sup> defects. The absorption intensity of 3143 cm<sup>-1</sup> is much weaker than that of 3107 cm<sup>-1</sup>. Generally, the stronger the absorption of 3107 cm<sup>-1</sup>, the stronger the absorption of 3143 cm<sup>-1</sup> is.

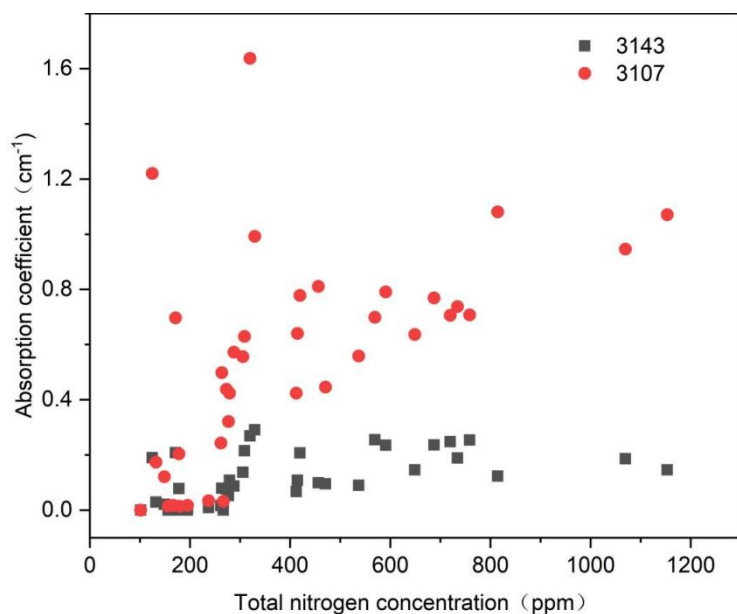

**Figure S3.** If there is 3107  $\text{cm}^{-1}$  defect in the diamond, the higher the total nitrogen, the more the 3107  $\text{cm}^{-1}$  defect. However, the 3143  $\text{cm}^{-1}$  defect do not related to the total nitrogen concentration.

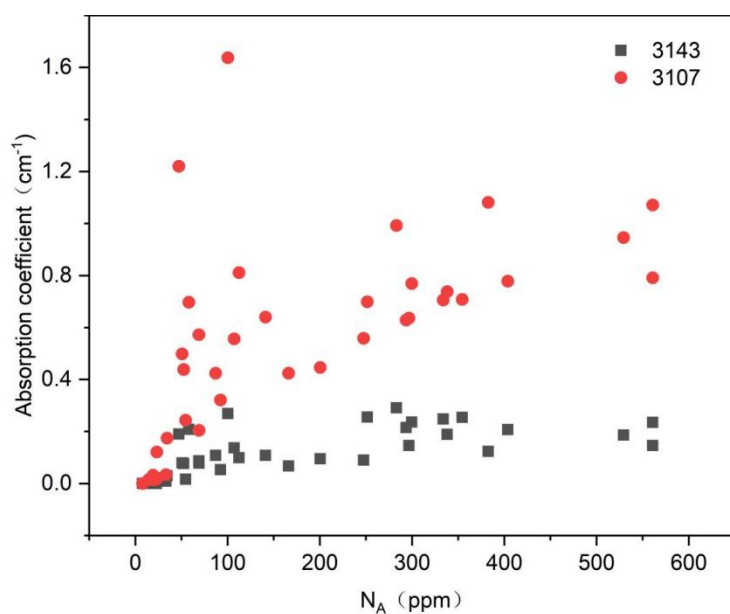

**Figure S4.** There is a similar relationship between the A center and the total nitrogen concentration with the 3107 and 3143  $\text{cm}^{-1}$  defects.

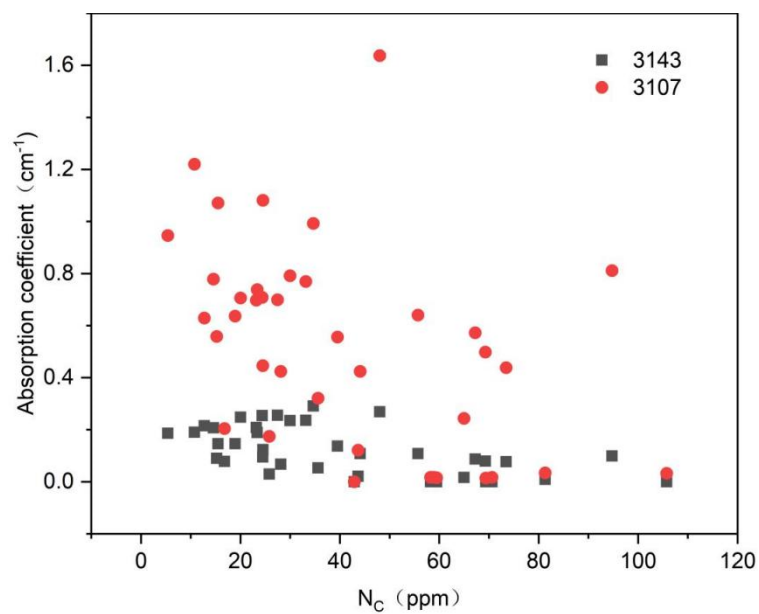

**Figure S5.** There was no correlation between the C center concentration and the 3107,4143  $\text{cm}^{-1}$  defects.

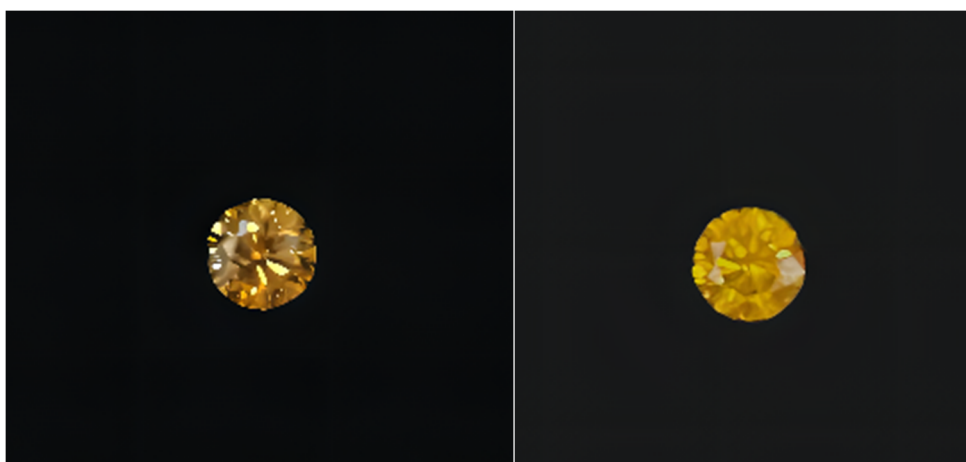

**Figure S6.** the color change of DIAM 10703 before and after high temperature annealing ( left: before annealing; right: after annealing)
